# Supplementary material for: Mechanisms into dehydroaromatization of bio-derived limonene to p-cymene over Pd/HZSM-5 in the presence and absence of H2
Source: Royal Society of Chemistry journal article supplement (doi:10.1039/c6ra17159a), 2016-01-01
Supplement: c6ra17159a1.pdf [file c6ra17159a1.pdf]

## **Supplementary Material**

### **Mechanisms into Dehydroaromatization of Bio-derived Limonene to *p*-Cymene over Pd/HZSM-5 in presence and absence of H<sub>2</sub>**

Huimei Cui, Jingjing Zhang, Zhicheng Luo, Chen Zhao\*

Shanghai Key Laboratory of Green Chemistry and Chemical Processes, School of Chemistry and Molecular  
Engineering, East China Normal University, Shanghai 200062, China

Email: czhao@chem.ecnu.edu.cn

**Table S1.** Limonene dehydroaromatization over Pd/HZSM-5 at different H<sub>2</sub> pressure.<sup>a</sup>

| Condition             | Time (min) | Conv. (%) | Yield (%)             |                    |                       |               | Pressure (bar) <sup>b</sup> |
|-----------------------|------------|-----------|-----------------------|--------------------|-----------------------|---------------|-----------------------------|
|                       |            |           | Partial Hydrogenation | Full Hydrogenation | Dehydro-aromatization | Isomerization |                             |
| 0 bar H <sub>2</sub>  | 0          | 7         | 1                     | 0                  | 1                     | 5             | 2                           |
|                       | 30         | 19        | 1                     | 0                  | 3                     | 15            |                             |
|                       | 60         | 19        | 1                     | 0                  | 2                     | 16            |                             |
|                       | 90         | 17        | 1                     | 0                  | 2                     | 14            |                             |
|                       | 120        | 21        | 1                     | 0                  | 3                     | 17            |                             |
| 2 bar H <sub>2</sub>  | 0          | 11        | 3                     | 1                  | 3                     | 4             | 3                           |
|                       | 30         | 24        | 6                     | 1                  | 7                     | 11            |                             |
|                       | 60         | 37        | 10                    | 1                  | 13                    | 13            |                             |
|                       | 90         | 46        | 12                    | 1                  | 19                    | 14            |                             |
|                       | 120        | 54        | 15                    | 1                  | 24                    | 14            |                             |
| 6 bar H <sub>2</sub>  | 0          | 24        | 7                     | 1                  | 5                     | 10            | 6                           |
|                       | 30         | 42        | 13                    | 1                  | 12                    | 16            |                             |
|                       | 60         | 62        | 21                    | 2                  | 24                    | 15            |                             |
|                       | 90         | 72        | 28                    | 2                  | 30                    | 12            |                             |
|                       | 120        | 78        | 33                    | 3                  | 35                    | 7             |                             |
| 10 bar H <sub>2</sub> | 0          | 39        | 10                    | 2                  | 9                     | 18            | 10                          |
|                       | 30         | 59        | 18                    | 2                  | 19                    | 20            |                             |
|                       | 60         | 71        | 25                    | 2                  | 27                    | 17            |                             |
|                       | 90         | 83        | 34                    | 4                  | 33                    | 11            |                             |
|                       | 120        | 83        | 34                    | 4                  | 34                    | 10            |                             |
| 14 bar H <sub>2</sub> | 0          | 34        | 11                    | 2                  | 10                    | 11            | 14                          |
|                       | 30         | 64        | 24                    | 4                  | 25                    | 11            |                             |
|                       | 60         | 86        | 38                    | 8                  | 36                    | 3             |                             |
|                       | 90         | 92        | 41                    | 12                 | 38                    | 1             |                             |
|                       | 120        | 95        | 40                    | 17                 | 36                    | 1             |                             |

<sup>a</sup> General conditions: 10 mL limonene, 0.02g 1% Pd/HZSM-5(258), 80 mL *n*-dodecane, 260 °C, stirring at 600 rpm.

<sup>b</sup> This records the pressure for reactions lasting 2 h at working temperature.

**Table S2.** Equations for different systems with additional 6, 10, or 14 bar hydrogen.<sup>a</sup>

| Condition             | Equations                                                                                                                                                                                                                                                            |
|-----------------------|----------------------------------------------------------------------------------------------------------------------------------------------------------------------------------------------------------------------------------------------------------------------|
| 6 bar H <sub>2</sub>  | $\frac{dc_1}{dt} = -k_1 \times c_1$ $\frac{dc_2}{dt} = k_1 \times c_1 - k_2 \times c_2 - k_9 \times c_2$ $\frac{dc_3}{dt} = k_9 \times c_2 - k_6 \times c_3$ $\frac{dc_4}{dt} = k_6 \times c_3$ $\frac{dc_5}{dt} = k_2 \times c_2$                                   |
| 10 bar H <sub>2</sub> | $\frac{dc_1}{dt} = -k_1 \times c_1 + k_8 \times c_2$ $\frac{dc_2}{dt} = k_1 \times c_1 - k_8 \times c_2 - k_2 \times c_2 - k_9 \times c_2$ $\frac{dc_3}{dt} = k_9 \times c_2 - k_6 \times c_3$ $\frac{dc_4}{dt} = k_6 \times c_3$ $\frac{dc_5}{dt} = k_2 \times c_2$ |
| 14 bar H <sub>2</sub> | $\frac{dc_1}{dt} = -k_1 \times c_1$ $\frac{dc_2}{dt} = k_1 \times c_1 - k_2 \times c_2 - k_9 \times c_2$ $\frac{dc_3}{dt} = k_9 \times c_2 - k_6 \times c_3$ $\frac{dc_4}{dt} = k_6 \times c_3$ $\frac{dc_5}{dt} = k_2 \times c_2$                                   |

<sup>a</sup> c<sub>X</sub> refers to the concentration of compound X, and X represent the labelling numbers in Scheme 3..

---

### Calculation Methods:

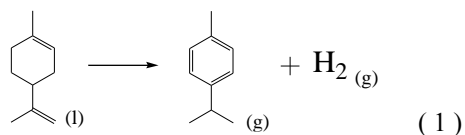

When the substrate limonene is 10 mL, and the density of limonene in atmosphere and room temperature was obtained as:

$$n = \frac{D \times V}{M} \quad (2)$$

Where D and V are density and volume of limonene, respectively.

Accordingly,  $n$  (limonene) = 59.19 mmol.

Theoretical yield was also calculated as well.

Thermodynamic parameters for limonene dehydroaromatization at 260 °C was gained from HSC software from Table 3,

$$K_{sp} = 2.26 \times 10^{10}.$$

$$\frac{n_{(p\text{-cymene})}^2}{0.059 - n_{(p\text{-cymene})}} = 2.26 \times 10^{10} \quad (3)$$

$$n_{(p\text{-cymene})} \approx 0.059 \text{ mol.}$$

The experimental yield was obtained:  $n_{(p\text{-cymene})} = 0.05919 \times 74\% = 0.0438 \text{ mol} = 43.8 \text{ mmol}$ .
